# Supplementary material
Source: ML conference proceedings conference paper supplement (https://proceedings.mlr.press/v130/reza-karimi21a.html)
Supplement: Supplementary file 1 [file reza-karimi21a-supp.zip]

Archive with 2 entries (2 files):
- 141-supp.pdf
- code-online-active-model-selection.zip
